# Supplementary material
Source: publisher site journal article supplement (https://www.spandidos-publications.com/6127/downloadSupplementary)
Supplement: Supplementary file 1 [file downloadSupplementary]

## Sheet: correlatin
Table SVI. Genes correlation analysis.
No.	Related etiological Gene	Key Gene	R-Value	P-Value
1	SLC26A8	HSPA4	0.689561	0.018891
		SOX9	-0.0751077	0.82628
		SMAD2	0.718681	0.012708
		HIF1A	0.0795402	0.816174
		GSK3B	0.78735	0.00401945
2	DNAH17	HSPA4	0.789499	0.00385265
		SOX9	0.0614728	0.857508
		SMAD2	0.843583	0.00110023
		HIF1A	0.367573	0.26609
		GSK3B	0.856606	0.000758872
3	KLHL10	HSPA4	0.683693	0.0203577
		SOX9	-0.399591	0.223385
		SMAD2	0.895175	0.000196346
		HIF1A	0.31237	0.349678
		GSK3B	0.866556	0.00055737
4	SPAG17	HSPA4	0.811476	0.00242676
		SOX9	-0.320082	0.337261
		SMAD2	0.927411	3.94071e-05
		HIF1A	0.446427	0.16869
		GSK3B	0.923505	4.96027e-05
5	DNAH1	HSPA4	0.700089	0.0164513
		SOX9	-0.0103379	0.975934
		SMAD2	0.836378	0.00133269
		HIF1A	0.329575	0.322301
		GSK3B	0.857352	0.000742115
6	AK7	HSPA4	0.238248	0.480509
		SOX9	0.0263346	0.938737
		SMAD2	0.31197	0.350328
		HIF1A	-0.370021	0.262674
		GSK3B	0.350556	0.290529
7	FSIP2	HSPA4	0.792047	0.00366168
		SOX9	-0.318192	0.340281
		SMAD2	0.725922	0.0114323
		HIF1A	0.136234	0.689591
		GSK3B	0.826529	0.00170778
8	TTC29	HSPA4	0.774357	0.00514369
		SOX9	-0.316071	0.343688
		SMAD2	0.824631	0.00178827
		HIF1A	0.20579	0.54381
		GSK3B	0.864862	0.000588421
9	CATSPER1	HSPA4	0.655683	0.0284924
		SOX9	0.00797721	0.981429
		SMAD2	0.564598	0.0703659
		HIF1A	-0.0462611	0.892563
		GSK3B	0.633904	0.0362262
10	ARMC2	HSPA4	0.786342	0.00409947
		SOX9	-0.360183	0.276557
		SMAD2	0.915784	7.5595e-05
		HIF1A	0.386261	0.240642
		GSK3B	0.928428	3.70381e-05
11	NOS3	HSPA4	-0.276787	0.409961
		SOX9	0.555485	0.0760496
		SMAD2	-0.138218	0.685269
		HIF1A	-0.512966	0.106609
		GSK3B	-0.103263	0.762548
12	DNAH11	HSPA4	-0.55887	0.0739038
		SOX9	-0.0592768	0.862555
		SMAD2	-0.248549	0.461143
		HIF1A	-0.331809	0.318831
		GSK3B	-0.274933	0.413232
13	SPEF2	HSPA4	0.51632	0.10395
		SOX9	-0.300193	0.36976
		SMAD2	0.514173	0.105647
		HIF1A	-0.156154	0.646595
		GSK3B	0.541391	0.0854303
14	DNAH5	HSPA4	-0.304437	0.362695
		SOX9	0.287416	0.391448
		SMAD2	-0.483401	0.131977
		HIF1A	0.0296496	0.93104
		GSK3B	-0.510834	0.108323
15	TTC21A	HSPA4	0.762271	0.00638301
		SOX9	-0.140884	0.679476
		SMAD2	0.781176	0.00452816
		HIF1A	0.110222	0.746985
		GSK3B	0.830804	0.00153639
16	ACTL9	HSPA4	0.34138	0.304203
		SOX9	0.25875	0.442325
		SMAD2	0.518491	0.102251
		HIF1A	0.142479	0.676017
		GSK3B	0.511296	0.10795
17	DNAH8	HSPA4	0.763355	0.0062637
		SOX9	-0.352082	0.28829
		SMAD2	0.811797	0.00240941
		HIF1A	0.157321	0.644106
		GSK3B	0.853378	0.000834745
18	GALNTL5	HSPA4	0.696431	0.0172717
		SOX9	-0.403036	0.219048
		SMAD2	0.936926	2.12353e-05
		HIF1A	0.480669	0.134498
		GSK3B	0.903803	0.000135122
19	PARK7	HSPA4	0.584351	0.0590425
		SOX9	0.224071	0.507743
		SMAD2	0.3072	0.358133
		HIF1A	0.559771	0.0733395
		GSK3B	0.43624	0.179803
20	TEKT2	HSPA4	0.739996	0.00922179
		SOX9	-0.00429126	0.990009
		SMAD2	0.867722	0.000536731
		HIF1A	0.380459	0.248387
		GSK3B	0.860863	0.000666912
